# Supplementary material for: Continuous in situ monitoring of the vertical and horizontal passage of a labeled-water pulse through a boreal Scots pine forest
Source: Copernicus journal article supplement (doi:10.5194/egusphere-2025-3025), 2025-09-09
Supplement: Supplementary file 1 [file egusphere-2025-3025-supplement.pdf]

1 Table S1. Tree distances from the plot center.

2 **Tree Distance to plot center (m)**

|    |    |      |
|----|----|------|
| 3  | 1  | 1.2  |
| 4  | 2  | 0.7  |
| 5  | 6  | 3.8  |
| 6  | 8  | 3.4  |
| 7  | 9  | 8.5  |
| 8  | 10 | 2.9  |
| 9  | 12 | 6.7  |
| 10 | 20 | 5.4  |
| 11 | 27 | 10.2 |
| 12 | 28 | 5.6  |

13

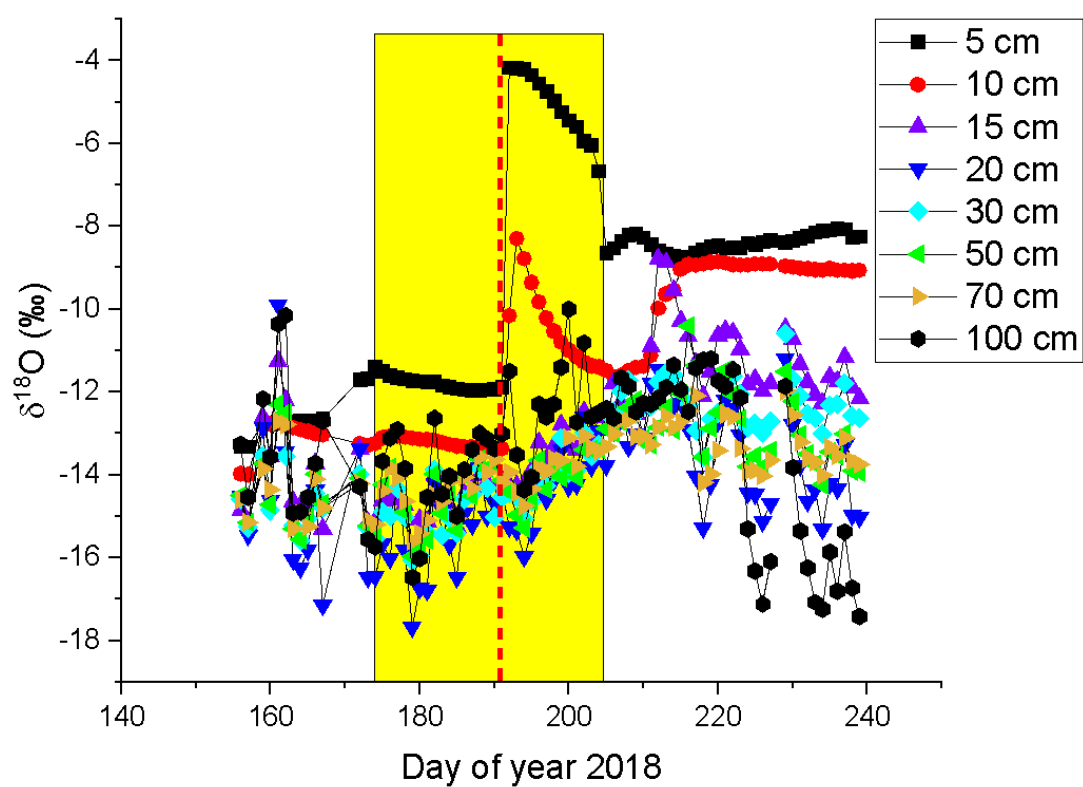

14

15 *Fig. S1.  $\delta^{18}\text{O}$  of soil water at all depths. Yellow bar is the drought period and vertical red line is*  
 16 *the date of labeling.*

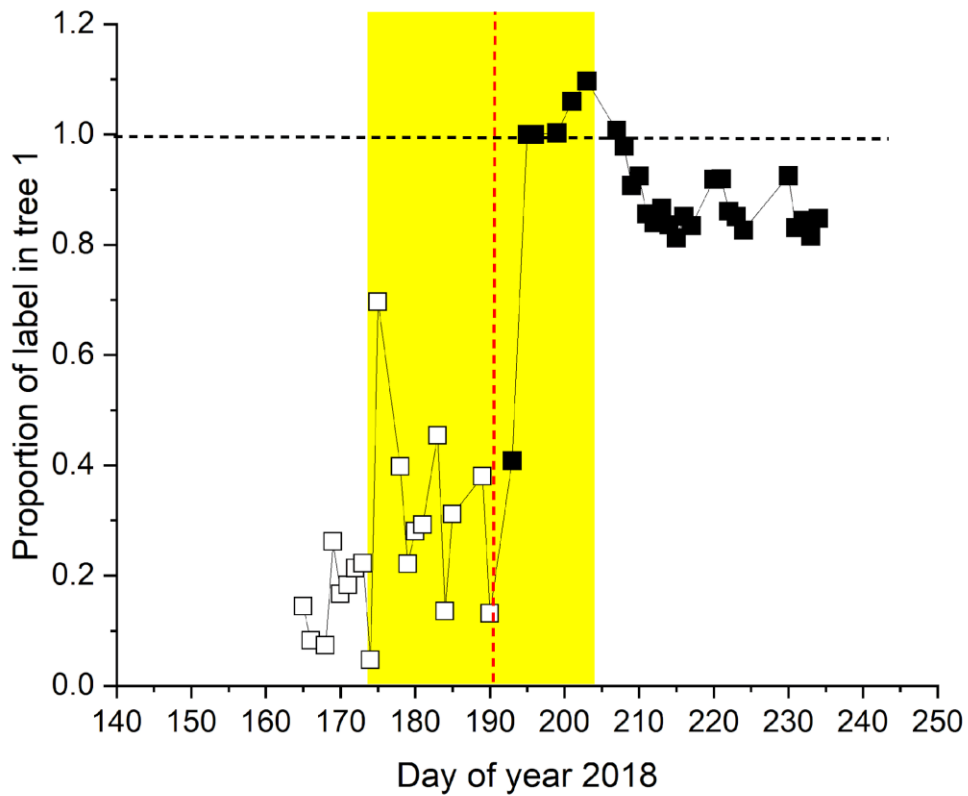

17

18 Fig. S2. Proportion of xylem label in tree 1, the most heavily labeled tree in the study. Points  
 19 before the labeling occurred (at the vertical red line) are unfilled. Because the label appeared  
 20 first in tree 1, the label was initially all in that tree. As the other trees were labeled, the  
 21 proportion fell and stabilized.

22

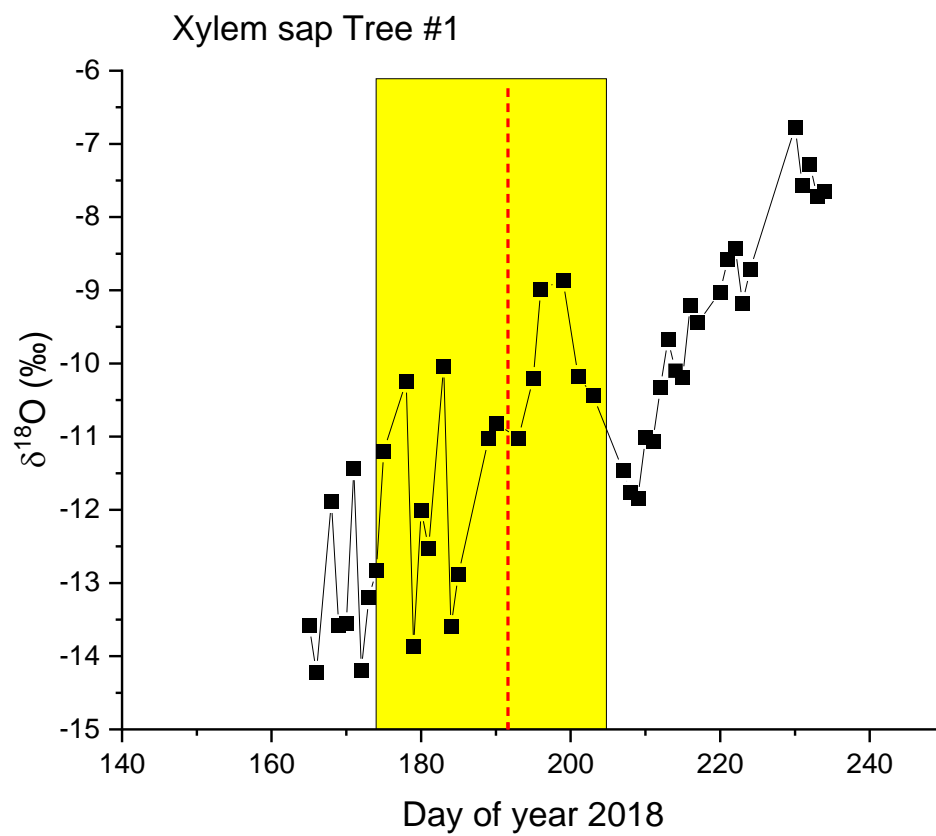

23

24 Figure S3. Xylem water  $\delta^{18}\text{O}$  of tree 1, which was heavily labeled with  $\delta^2\text{H}$ . The yellow box shows  
 25 the drought period and the dashed red vertical line shows the labeling date.

26

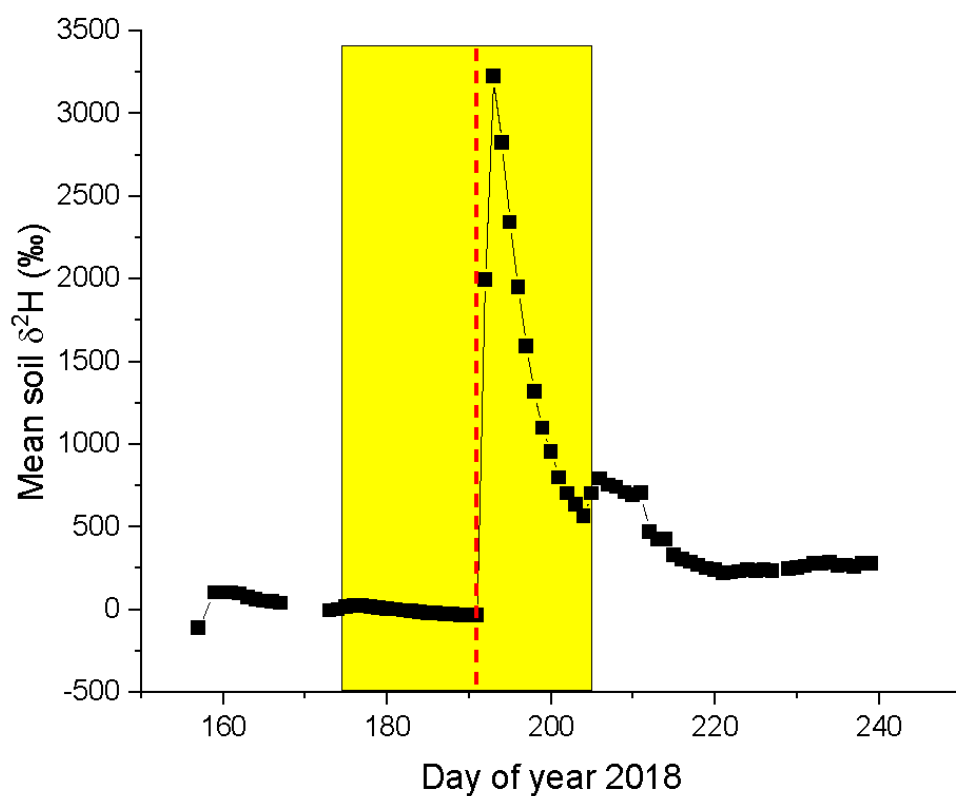

27

28 Fig. S4. Volume-weighted mean  $\delta^2\text{H}$  of soil water over all depths to 60 cm. The yellow box  
 29 shows the drought period and the vertical red line shows the labeling date.

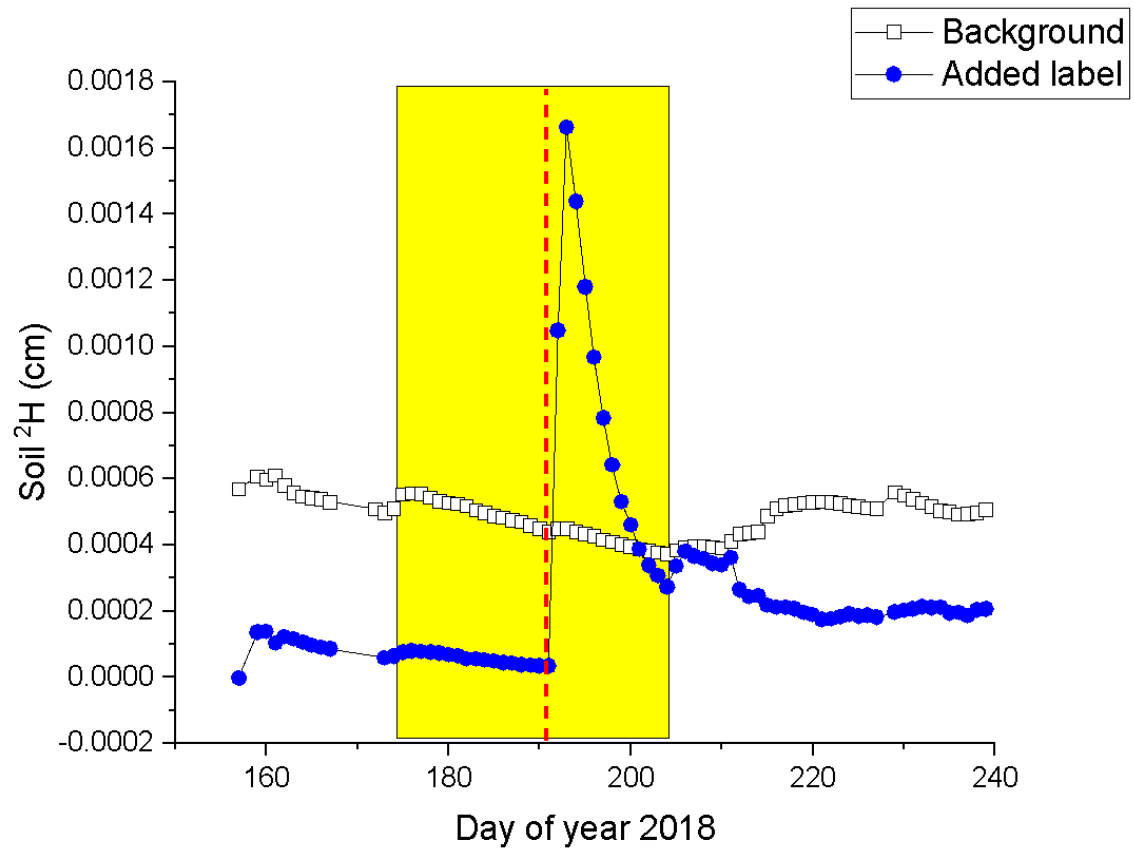

30

31 Fig. S5. Total amount of soil <sup>2</sup>H derived from natural abundance via the lc d-excess and  $\delta^{18}\text{O}$  vs.  
 32 that added in the label. The drought is shown as the yellow box and the labeling date is shown  
 33 as a vertical red line. The labeling was sufficient to rise above the background, but it was rapidly  
 34 diluted afterward.

35
